# Supplementary material
Source: ML conference proceedings conference paper supplement (https://openreview.net/forum?id=i3sWs5614Y)
Supplement: supplementary_material [file README_GMixup_GTrans.docx]

# README for G-Mixup + GTrans Experiments

## 1. Requirements

The following packages are required to run the experiments:

- pytorch==1.7.1
- cudatoolkit==11.0
- torch==1.7.1
- torch_geometric==1.6.3
- opencv-python==4.5.3.56
- scikit-image==0.18.3

To install torch-geometric and its dependencies:

```
pip install torch_spline_conv-1.2.0-cp37-cp37m-linux_x86_64.whl
pip install torch_scatter-2.0.5-cp37-cp37m-linux_x86_64.whl
pip install torch_sparse-0.6.8-cp37-cp37m-linux_x86_64.whl
pip install torch_cluster-1.5.8-cp37-cp37m-linux_x86_64.whl
pip install torch-geometric==1.6.3
```

## 2. Dataset

The datasets used in the experiments are built-in datasets from torch_geometric. They will be automatically downloaded to the default location if not present.

## 3. Running Experiments

To run the baseline GIN model without transfer learning or mixup, use:
```
sh run_vanilla.sh
```
To run the G-Mixup model, use:
```
sh run_gmixup.sh
```

## 4. Running GTrans-Enhanced G-Mixup

To run G-Mixup with our proposed GTrans transfer learning method, use the following command:

```
python gmixup_transfer.py --dataset IMDB-BINARY --gmixup True --use_transfer True --epoch 200 --log_screen True --data_path ../dataset/loaded/
```

This will enable structural knowledge transfer using Gromov-Wasserstein alignment between source and target classes.

## 5. Running G-Mixup without Transfer (Baseline)

To run G-Mixup without applying GTrans (i.e., no transfer learning baseline), use:

```
python gmixup_no_transfer_baseline.py --dataset IMDB-BINARY --gmixup True --method ICE --epoch 200 --log_screen True
```
